# Supplementary material for: Neurite dispersion: a new marker of multiple sclerosis spinal cord pathology?
Source: PubMed Central journal article supplement (PMC5590517; doi:10.1002/acn3.445), 2017-08-15
Supplement: ACN3-4-663-s003.pdf [file ACN3-4-663-s003.pdf]

### SUPPLEMENTARY MATERIAL 3: FULL RESULTS FROM LINEAR REGRESSION MODELS

```
> ##### MODEL 1: CONTROLS
> #
> #

> summary(ivf_modell_HC)
Call:
lm(formula = ivf ~ wcv + msfrac + nffrac + gfapfrac + ibafrac,
    data = data_controls)

Residuals:
    Min       1Q   Median       3Q      Max
-0.05412 -0.02567 -0.01802  0.01669  0.09290

Coefficients:
              Estimate Std. Error t value Pr(>|t|)
(Intercept)  0.15026     0.14570   1.031  0.3199
wcv           0.07749     0.05987   1.294  0.2165
msfrac       0.39498     0.19039   2.075  0.0569 .
nffrac       0.13096     0.11127   1.177  0.2588
gfapfrac    -0.89722     0.43194  -2.077  0.0567 .
ibafrac      0.67135     0.67872   0.989  0.3394
---
Signif. codes:  0 '***' 0.001 '**' 0.01 '*' 0.05 '.' 0.1 ' ' 1

Residual standard error: 0.04993 on 14 degrees of freedom
Multiple R-squared:  0.5078,    Adjusted R-squared:  0.332
F-statistic: 2.889 on 5 and 14 DF,  p-value: 0.05371
> # Standardised beta coefficients
> standardCoefs(ivf_modell_HC)
              b          beta
wcv          0.07749014  0.2510662
msfrac       0.39497600  0.4167176
nffrac       0.13096428  0.2325335
gfapfrac    -0.89721912 -0.4075425
ibafrac      0.67135419  0.2020404

> #
> #
> summary(ndi_modell_HC)
Call:
lm(formula = ndi ~ wcv + msfrac + nffrac + gfapfrac + ibafrac,
    data = data_controls)

Residuals:
    Min       1Q   Median       3Q      Max
-0.19269 -0.12787  0.01159  0.09737  0.18818

Coefficients:
              Estimate Std. Error t value Pr(>|t|)
(Intercept)  0.62576     0.43642   1.434 0.173571
wcv          -0.83221     0.17932  -4.641 0.000382 ***
msfrac       0.45880     0.57027   0.805 0.434541
```

```

nfrac      -0.05188    0.33330  -0.156 0.878521
gfapfrac   1.08752    1.29380   0.841 0.414718
ibafrac    -1.42250    2.03302  -0.700 0.495579
---
Signif. codes:  0 '***' 0.001 '**' 0.01 '*' 0.05 '.' 0.1 ' ' 1

```

```

Residual standard error: 0.1495 on 14 degrees of freedom
Multiple R-squared:  0.6253,    Adjusted R-squared:  0.4915
F-statistic: 4.673 on 5 and 14 DF,  p-value: 0.01019

```

```

> # Standardised beta coefficients
> standardCoefs(ndi_modell_HC)

```

```

           b          beta
wcv      -0.83221184 -0.78541385
msfrac    0.45880335  0.14100047
nfrac    -0.05188174 -0.02683305
gfapfrac  1.08752470  0.14389190
ibafrac  -1.42249562 -0.12469822

```

```

> #
> #
> summary(odi_modell_HC)
Call:
lm(formula = odi ~ wcv + msfrac + nfrac + gfapfrac + ibafrac,
    data = data_controls)

```

```

Residuals:
      Min       1Q   Median       3Q      Max
-0.073254 -0.023033 -0.008333  0.017822  0.125030

```

```

Coefficients:
            Estimate Std. Error t value Pr(>|t|)
(Intercept)  0.24676    0.14487   1.703   0.111
wcv          0.42300    0.05952   7.106 5.28e-06 ***
msfrac      -0.00650    0.18930  -0.034   0.973
nfrac       -0.14232    0.11064  -1.286   0.219
gfapfrac    0.21319    0.42947   0.496   0.627
ibafrac     -1.14437    0.67485  -1.696   0.112
---

```

```

Signif. codes:  0 '***' 0.001 '**' 0.01 '*' 0.05 '.' 0.1 ' ' 1

```

```

Residual standard error: 0.04964 on 14 degrees of freedom
Multiple R-squared:  0.8082,    Adjusted R-squared:  0.7397
F-statistic: 11.8 on 5 and 14 DF,  p-value: 0.000129

```

```

> # Standardised beta coefficients
> standardCoefs(odi_modell_HC)

```

```

           b          beta
wcv      0.422997230  0.860404969
msfrac  -0.006500324 -0.004305561
nfrac   -0.142318836 -0.158642139
gfapfrac 0.213195204  0.060796051
ibafrac  -1.144370236 -0.216210415

```

```

> #
> #
> summary(fa_modell_HC)
Call:
lm(formula = fa ~ wcv + msfrac + nfrac + gfapfrac + ibafrac,
    data = data_controls)

Residuals:
    Min       1Q   Median       3Q      Max
-0.22040 -0.03995  0.03243  0.04841  0.07790

Coefficients:
            Estimate Std. Error t value Pr(>|t|)
(Intercept)  0.42545     0.25394   1.675 0.116041
wcv         -0.51019     0.10434  -4.890 0.000239 ***
msfrac      -0.47541     0.33183  -1.433 0.173899
nfrac       -0.01578     0.19394  -0.081 0.936297
gfapfrac     0.64552     0.75284   0.857 0.405638
ibafrac      2.41020     1.18298   2.037 0.060973 .
---
Signif. codes:  0 '***' 0.001 '**' 0.01 '*' 0.05 '.' 0.1 ' ' 1

Residual standard error: 0.08702 on 14 degrees of freedom
Multiple R-squared:  0.6817,    Adjusted R-squared:  0.568
F-statistic: 5.996 on 5 and 14 DF,  p-value: 0.003616
> # Standardised beta coefficients
> standardCoefs(fa_modell_HC)
           b          beta
wcv      -0.51019002 -0.76269617
msfrac   -0.47541173 -0.23142955
nfrac    -0.01578151 -0.01292882
gfapfrac  0.64552208  0.13528924
ibafrac   2.41019624  0.33466992

> #
> #
> summary(ad_modell_HC)
Call:
lm(formula = ad ~ wcv + msfrac + nfrac + gfapfrac + ibafrac,
    data = data_controls)

Residuals:
    Min       1Q   Median       3Q      Max
-0.17680 -0.11628 -0.02447  0.06506  0.25146

Coefficients:
            Estimate Std. Error t value Pr(>|t|)
(Intercept)  0.6378     0.4442   1.436  0.1730
wcv          0.4856     0.1825   2.661  0.0186 *
msfrac       0.1360     0.5804   0.234  0.8181
nfrac        0.2121     0.3392   0.625  0.5419
gfapfrac     -1.7775     1.3168  -1.350  0.1985
ibafrac      6.0201     2.0692   2.909  0.0114 *
---
Signif. codes:  0 '***' 0.001 '**' 0.01 '*' 0.05 '.' 0.1 ' ' 1

Residual standard error: 0.1522 on 14 degrees of freedom

```

Multiple R-squared: 0.6106, Adjusted R-squared: 0.4715  
F-statistic: 4.39 on 5 and 14 DF, p-value: 0.01296

```
> # Standardised beta coefficients  
> standardCoefs(ad_modell_HC)
```

|          | b          | beta        |
|----------|------------|-------------|
| wcv      | 0.4856268  | 0.45906114  |
| msfrac   | 0.1360051  | 0.04186513  |
| nffrac   | 0.2121100  | 0.10988028  |
| gfapfrac | -1.7775107 | -0.23556603 |
| ibafrac  | 6.0200526  | 0.52858257  |

```
> #  
> #
```

```
> summary(rd_modell_HC)
```

Call:

```
lm(formula = rd ~ wcv + msfrac + nffrac + gfapfrac + ibafrac,  
    data = data_controls)
```

Residuals:

| Min      | 1Q       | Median   | 3Q      | Max     |
|----------|----------|----------|---------|---------|
| -0.13930 | -0.07470 | -0.02109 | 0.05208 | 0.22582 |

Coefficients:

|             | Estimate | Std. Error | t value | Pr(> t )   |
|-------------|----------|------------|---------|------------|
| (Intercept) | 0.3786   | 0.3707     | 1.021   | 0.32449    |
| wcv         | 0.5587   | 0.1523     | 3.667   | 0.00254 ** |
| msfrac      | 0.4244   | 0.4845     | 0.876   | 0.39580    |
| nffrac      | 0.2357   | 0.2831     | 0.832   | 0.41914    |
| gfapfrac    | -1.6289  | 1.0991     | -1.482  | 0.16048    |
| ibafrac     | 2.1048   | 1.7271     | 1.219   | 0.24310    |

---

Signif. codes: 0 '\*\*\*' 0.001 '\*\*' 0.01 '\*' 0.05 '.' 0.1 ' ' 1

Residual standard error: 0.127 on 14 degrees of freedom

Multiple R-squared: 0.6036, Adjusted R-squared: 0.4621

F-statistic: 4.264 on 5 and 14 DF, p-value: 0.01447

```
> # Standardised beta coefficients  
> standardCoefs(rd_modell_HC)
```

|          | b          | beta       |
|----------|------------|------------|
| wcv      | 0.5586765  | 0.6383478  |
| msfrac   | 0.4243925  | 0.1579043  |
| nffrac   | 0.2356963  | 0.1475844  |
| gfapfrac | -1.6289263 | -0.2609342 |
| ibafrac  | 2.1047709  | 0.2233811  |

```
> #  
> #
```

```
> summary(md_modell_HC)
```

Call:

```
lm(formula = md ~ wcv + msfrac + nffrac + gfapfrac + ibafrac,  
    data = data_controls)
```

Residuals:

| Min      | 1Q       | Median   | 3Q      | Max     |
|----------|----------|----------|---------|---------|
| -0.14553 | -0.07667 | -0.02743 | 0.05765 | 0.19739 |

Coefficients:

```
      Estimate Std. Error t value Pr(>|t|)
(Intercept)  0.4533      0.3608   1.256  0.2295
wcv          0.5135      0.1482   3.464  0.0038 **
msfrac      0.2848      0.4714   0.604  0.5555
nffrac      0.2099      0.2755   0.762  0.4589
gfapfrac    -1.5801     1.0696  -1.477  0.1617
ibafrac     3.3560      1.6807   1.997  0.0657 .
---
Signif. codes:  0 '***' 0.001 '**' 0.01 '*' 0.05 '.' 0.1 ' ' 1
```

```
Residual standard error: 0.1236 on 14 degrees of freedom
Multiple R-squared:  0.62,    Adjusted R-squared:  0.4842
F-statistic: 4.568 on 5 and 14 DF,  p-value: 0.01113
```

```
> # Standardised beta coefficients
> standardCoefs(md_modell_HC)
```

```
      b      beta
wcv    0.5134829  0.5903590
msfrac 0.2847750  0.1066158
nffrac 0.2098885  0.1322421
gfapfrac -1.5801123 -0.2546893
ibafrac 3.3560108  0.3583920
```

```
> ##### MODEL 1: MS
> #
> #
```

```
> summary(ivf_modell_MS)
```

```
Call:
lm(formula = ivf ~ wcv + msfrac + nffrac + gfapfrac + ibafrac,
    data = data_multiple_sclerosis)
```

Residuals:

```
      Min       1Q   Median       3Q      Max
-0.10485 -0.04748 -0.01853  0.04332  0.18340
```

Coefficients:

```
      Estimate Std. Error t value Pr(>|t|)
(Intercept)  0.24755      0.09869   2.508  0.0200 *
wcv          -0.08227     0.09362  -0.879  0.3890
msfrac      -0.29601     0.16054  -1.844  0.0787 .
nffrac      0.10977     0.17280   0.635  0.5318
gfapfrac    -0.35039     0.19013  -1.843  0.0789 .
ibafrac     -0.31606     0.45558  -0.694  0.4951
---
Signif. codes:  0 '***' 0.001 '**' 0.01 '*' 0.05 '.' 0.1 ' ' 1
```

```
Residual standard error: 0.07482 on 22 degrees of freedom
Multiple R-squared:  0.2045,    Adjusted R-squared:  0.02366
F-statistic: 1.131 on 5 and 22 DF,  p-value: 0.3735
```

```
> # Standardised beta coefficients
> standardCoefs(ivf_modell_MS)
```

```
      b      beta
wcv   -0.08227353 -0.1926276
msfrac -0.29601342 -0.4373360
nffrac 0.10976930  0.1876239
gfapfrac -0.35038577 -0.4779905
```

```
ibafrac -0.31606390 -0.1929732
```

```
> #
```

```
> #
```

```
> summary(ndi_modell_MS)
```

```
Call:
```

```
lm(formula = ndi ~ wcv + msfrac + nfrac + gfapfrac + ibafrac,  
    data = data_multiple_sclerosis)
```

```
Residuals:
```

```
      Min       1Q   Median       3Q      Max  
-0.42076 -0.11052 -0.04117  0.12519  0.31868
```

```
Coefficients:
```

```
              Estimate Std. Error t value Pr(>|t|)  
(Intercept)   0.1679      0.2700   0.622 0.540280  
wcv            -0.4074      0.2561  -1.591 0.125934  
msfrac         1.9988      0.4392   4.552 0.000157 ***  
nfrac          0.2316      0.4727   0.490 0.628947  
gfapfrac       0.4142      0.5201   0.796 0.434289  
ibafrac        1.1817      1.2462   0.948 0.353283
```

```
---
```

```
Signif. codes:  0 '***' 0.001 '**' 0.01 '*' 0.05 '.' 0.1 ' ' 1
```

```
Residual standard error: 0.2047 on 22 degrees of freedom
```

```
Multiple R-squared:  0.687,    Adjusted R-squared:  0.6159
```

```
F-statistic: 9.658 on 5 and 22 DF,  p-value: 5.483e-05
```

```
> # Standardised beta coefficients
```

```
> standardCoefs(ndi_modell_MS)
```

```
              b          beta  
wcv          -0.4073905 -0.2187166  
msfrac       1.9988116  0.6771551  
nfrac        0.2316374  0.0907880  
gfapfrac     0.4142172  0.1295727  
ibafrac      1.1817497  0.1654475
```

```
> #
```

```
> #
```

```
> summary(odi_modell_MS)
```

```
Call:
```

```
lm(formula = odi ~ wcv + msfrac + nfrac + gfapfrac + ibafrac,  
    data = data_multiple_sclerosis)
```

```
Residuals:
```

```
      Min       1Q   Median       3Q      Max  
-0.130467 -0.052017  0.002505  0.051527  0.104710
```

```
Coefficients:
```

```
              Estimate Std. Error t value Pr(>|t|)  
(Intercept)   0.01956      0.08849   0.221  0.827  
wcv            0.41708      0.08394   4.969 5.68e-05 ***  
msfrac         0.23469      0.14394   1.630  0.117  
nfrac          0.41885      0.15493   2.703  0.013 *  
gfapfrac       0.04865      0.17047   0.285  0.778  
ibafrac       -0.49001      0.40847  -1.200  0.243
```

---

Signif. codes: 0 '\*\*\*' 0.001 '\*\*' 0.01 '\*' 0.05 '.' 0.1 ' ' 1

Residual standard error: 0.06709 on 22 degrees of freedom  
Multiple R-squared: 0.6613, Adjusted R-squared: 0.5843  
F-statistic: 8.59 on 5 and 22 DF, p-value: 0.0001243

```
> # Standardised beta coefficients
> standardCoefs(odi_modell_MS)
```

|          | b           | beta        |
|----------|-------------|-------------|
| wcv      | 0.41708328  | 0.71067230  |
| msfrac   | 0.23469167  | 0.25234215  |
| nffrac   | 0.41884872  | 0.52101814  |
| gfapfrac | 0.04864748  | 0.04829714  |
| ibafrac  | -0.49001212 | -0.21772949 |

```
> #
> #
```

```
> summary(fa_modell_MS)
```

Call:

```
lm(formula = fa ~ wcv + msfrac + nffrac + gfapfrac + ibafrac,
    data = data_multiple_sclerosis)
```

Residuals:

|  | Min      | 1Q       | Median   | 3Q      | Max     |
|--|----------|----------|----------|---------|---------|
|  | -0.28667 | -0.17121 | -0.02764 | 0.15294 | 0.34193 |

Coefficients:

|             | Estimate | Std. Error | t value | Pr(> t ) |
|-------------|----------|------------|---------|----------|
| (Intercept) | 0.25789  | 0.25625    | 1.006   | 0.325    |
| wcv         | -0.08198 | 0.24309    | -0.337  | 0.739    |
| msfrac      | 0.51887  | 0.41685    | 1.245   | 0.226    |
| nffrac      | 0.06332  | 0.44867    | 0.141   | 0.889    |
| gfapfrac    | -0.10529 | 0.49368    | -0.213  | 0.833    |
| ibafrac     | 1.05439  | 1.18290    | 0.891   | 0.382    |

Residual standard error: 0.1943 on 22 degrees of freedom  
Multiple R-squared: 0.2452, Adjusted R-squared: 0.07366  
F-statistic: 1.429 on 5 and 22 DF, p-value: 0.2529

```
> # Standardised beta coefficients
> standardCoefs(fa_modell_MS)
```

|          | b           | beta        |
|----------|-------------|-------------|
| wcv      | -0.08197811 | -0.07200420 |
| msfrac   | 0.51886502  | 0.28758075  |
| nffrac   | 0.06332446  | 0.04060509  |
| gfapfrac | -0.10528691 | -0.05388263 |
| ibafrac  | 1.05439215  | 0.24150487  |

```
> #
> #
```

```
> summary(ad_modell_MS)
```

Call:

```
lm(formula = ad ~ wcv + msfrac + nffrac + gfapfrac + ibafrac,
    data = data_multiple_sclerosis)
```

Residuals:

```
      Min       1Q   Median       3Q      Max
-0.45061 -0.18123 -0.00208  0.11087  0.54071
```

Coefficients:

```
      Estimate Std. Error t value Pr(>|t|)
(Intercept)  1.7779      0.3653   4.867 7.27e-05 ***
wcv          -0.1706      0.3465  -0.492 0.627425
msfrac      -2.5924      0.5942  -4.363 0.000249 ***
nffrac       -0.7575      0.6396  -1.184 0.248891
gfapfrac    -0.8645      0.7038  -1.228 0.232289
ibafrac     -2.0818      1.6863  -1.235 0.230011
```

---

Signif. codes: 0 '\*\*\*' 0.001 '\*\*' 0.01 '\*' 0.05 '.' 0.1 ' ' 1

Residual standard error: 0.2769 on 22 degrees of freedom

Multiple R-squared: 0.7066, Adjusted R-squared: 0.6399

F-statistic: 10.6 on 5 and 22 DF, p-value: 2.798e-05

```
> # Standardised beta coefficients
```

```
> standardCoefs(ad_modell_MS)
```

```
      b      beta
wcv    -0.1705805 -0.06553108
msfrac -2.5924364 -0.62845106
nffrac -0.7575437 -0.21245874
gfaprac -0.8644660 -0.19349970
ibafrac -2.0818402 -0.20855906
```

```
> #
```

```
> #
```

```
> summary(rd_modell_MS)
```

Call:

```
lm(formula = rd ~ wcv + msfrac + nffrac + gfapfrac + ibafrac,
    data = data_multiple_sclerosis)
```

Residuals:

```
      Min       1Q   Median       3Q      Max
-0.45004 -0.23725  0.02189  0.16744  0.74146
```

Coefficients:

```
      Estimate Std. Error t value Pr(>|t|)
(Intercept)  1.4012      0.4460   3.141 0.00474 **
wcv          -0.1737      0.4231  -0.411 0.68538
msfrac      -1.9533      0.7256  -2.692 0.01332 *
nffrac       -0.7120      0.7810  -0.912 0.37184
gfapfrac    -0.8204      0.8593  -0.955 0.35008
ibafrac     -1.9581      2.0591  -0.951 0.35195
```

---

Signif. codes: 0 '\*\*\*' 0.001 '\*\*' 0.01 '\*' 0.05 '.' 0.1 ' ' 1

Residual standard error: 0.3382 on 22 degrees of freedom

Multiple R-squared: 0.5194, Adjusted R-squared: 0.4102

F-statistic: 4.756 on 5 and 22 DF, p-value: 0.004265

```
> # Standardised beta coefficients
```

```
> standardCoefs(rd_modell_MS)
```

```
      b      beta
wcv    -0.1737172 -0.06994211
msfrac -1.9532896 -0.49625851
nffrac -0.7119917 -0.20927616
```



```
gfapfrac -0.8204378 -0.19246687
ibafrac -1.9581213 -0.20558870
```

```
> #
```

```
> #
```

```
> summary(md_modell_MS)
```

```
Call:
```

```
lm(formula = md ~ wcv + msfrac + nfrac + gfapfrac + ibafrac,
    data = data_multiple_sclerosis)
```

```
Residuals:
```

```
      Min       1Q   Median       3Q      Max
-0.41830 -0.22987 -0.01078  0.12651  0.66763
```

```
Coefficients:
```

```
              Estimate Std. Error t value Pr(>|t|)
(Intercept)    1.5188     0.4066   3.736  0.00115 **
wcv            -0.1634     0.3857  -0.424  0.67584
msfrac        -2.1414     0.6614  -3.238  0.00378 **
nfrac         -0.7662     0.7119  -1.076  0.29342
gfapfrac      -0.8221     0.7833  -1.050  0.30530
ibafrac       -1.9713     1.8768  -1.050  0.30494
```

```
---
```

```
Signif. codes:  0 '***' 0.001 '**' 0.01 '*' 0.05 '.' 0.1 ' ' 1
```

```
Residual standard error: 0.3082 on 22 degrees of freedom
```

```
Multiple R-squared:  0.601,    Adjusted R-squared:  0.5103
```

```
F-statistic: 6.628 on 5 and 22 DF,  p-value: 0.0006646
```

```
> # Standardised beta coefficients
```

```
> standardCoefs(md_modell_MS)
```

```
              b              beta
wcv          -0.1634456 -0.06578528
msfrac      -2.1414243 -0.54388086
nfrac       -0.7662329 -0.22514658
gfapfrac    -0.8221089 -0.19279661
ibafrac     -1.9713285 -0.20690852
```

```

> ##### MODEL 2: CONTROLS

> #
> #
> summary(ivf_model2_HC)
Call:
lm(formula = ivf ~ wcv + msfrac + nfrac, data = data_controls)

Residuals:
    Min       1Q   Median       3Q      Max
-0.056495 -0.031848 -0.014634  0.005901  0.101303

Coefficients:
              Estimate Std. Error t value Pr(>|t|)
(Intercept) -0.13275    0.05747  -2.310  0.0346 *
wcv           0.07488    0.06430   1.164  0.2613
msfrac       0.34605    0.19746   1.752  0.0988 .
nfrac        0.18180    0.11550   1.574  0.1350
---
Signif. codes:  0 '***' 0.001 '**' 0.01 '*' 0.05 '.' 0.1 ' ' 1

Residual standard error: 0.05427 on 16 degrees of freedom
Multiple R-squared:  0.3354,    Adjusted R-squared:  0.2108
F-statistic: 2.691 on 3 and 16 DF,  p-value: 0.08106
> # Standardised beta coefficients
> standardCoefs(ivf_model2_HC)
              b      beta
wcv      0.0748756 0.2425952
msfrac  0.3460469 0.3650952
nfrac   0.1818004 0.3227954

> #
> #
> summary(ndi_model2_HC)
Call:
lm(formula = ndi ~ wcv + msfrac + nfrac, data = data_controls)

Residuals:
    Min       1Q   Median       3Q      Max
-0.23728 -0.10119  0.01995  0.10064  0.20230

Coefficients:
              Estimate Std. Error t value Pr(>|t|)
(Intercept)   0.9700    0.1538   6.308 1.04e-05 ***
wcv           -0.8364    0.1720  -4.862 0.000173 ***
msfrac        0.4806    0.5283   0.910 0.376480
nfrac        -0.1408    0.3090  -0.456 0.654814
---
Signif. codes:  0 '***' 0.001 '**' 0.01 '*' 0.05 '.' 0.1 ' ' 1

Residual standard error: 0.1452 on 16 degrees of freedom
Multiple R-squared:  0.5964,    Adjusted R-squared:  0.5207
F-statistic: 7.88 on 3 and 16 DF,  p-value: 0.001882
> # Standardised beta coefficients
> standardCoefs(ndi_model2_HC)
              b      beta

```

```
wcv      -0.8363835 -0.78935088
msfrac   0.4805778  0.14769224
nffrac   -0.1407752 -0.07280844
```

```
> #
> #
```

```
> summary(odi_model2_HC)
```

```
Call:
```

```
lm(formula = odi ~ wcv + msfrac + nffrac, data = data_controls)
```

```
Residuals:
```

```
      Min       1Q   Median       3Q      Max
-0.072079 -0.033167  0.004971  0.025464  0.124652
```

```
Coefficients:
```

```
              Estimate Std. Error t value Pr(>|t|)
(Intercept)   0.31593     0.05415   5.835 2.54e-05 ***
wcv            0.41174     0.06058   6.796 4.29e-06 ***
msfrac        -0.05560     0.18604  -0.299  0.7689
nffrac         -0.19852     0.10882  -1.824  0.0868 .
---

```

```
Signif. codes:  0 '***' 0.001 '**' 0.01 '*' 0.05 '.' 0.1 ' ' 1
```

```
Residual standard error: 0.05113 on 16 degrees of freedom
```

```
Multiple R-squared:  0.7675,    Adjusted R-squared:  0.7239
```

```
F-statistic: 17.6 on 3 and 16 DF, p-value: 2.541e-05
```

```
> # Standardised beta coefficients
```

```
> standardCoefs(odi_model2_HC)
```

```
              b          beta
wcv      0.41174246  0.83751200
msfrac -0.05559575 -0.03682445
nffrac -0.19852442 -0.22129424
```

```
> #
> #
```

```
> summary(fa_model2_HC)
```

```
Call:
```

```
lm(formula = fa ~ wcv + msfrac + nffrac, data = data_controls)
```

```
Residuals:
```

```
      Min       1Q   Median       3Q      Max
-0.223297 -0.052961 -0.001793  0.058757  0.140749
```

```
Coefficients:
```

```
              Estimate Std. Error t value Pr(>|t|)
(Intercept)   0.62343     0.10129   6.155 1.38e-05 ***
wcv            -0.47342     0.11333  -4.177 0.000711 ***
msfrac        -0.26182     0.34801  -0.752 0.462767
nffrac         0.07727     0.20356   0.380 0.709220
---

```

```
Signif. codes:  0 '***' 0.001 '**' 0.01 '*' 0.05 '.' 0.1 ' ' 1
```

```
Residual standard error: 0.09564 on 16 degrees of freedom
```

```
Multiple R-squared:  0.5605,    Adjusted R-squared:  0.4781
```

```
F-statistic: 6.802 on 3 and 16 DF, p-value: 0.003625
```

```

> # Standardised beta coefficients
> standardCoefs(fa_model2_HC)
              b          beta
wcv      -0.47342026 -0.70772811
msfrac  -0.26182380 -0.12745535
nffrac   0.07727417  0.06330598

> #
> #
> summary(ad_model2_HC)
Call:
lm(formula = ad ~ wcv + msfrac + nffrac, data = data_controls)

Residuals:
    Min       1Q   Median       3Q      Max
-0.23433 -0.12549 -0.04001  0.07075  0.31020

Coefficients:
              Estimate Std. Error t value Pr(>|t|)
(Intercept)  0.06798     0.19554   0.348  0.7326
wcv          0.53700     0.21878   2.455  0.0259 *
msfrac      0.32824     0.67184   0.489  0.6318
nffrac      0.52296     0.39297   1.331  0.2019
---
Signif. codes:  0 '***' 0.001 '**' 0.01 '*' 0.05 '.' 0.1 ' ' 1

Residual standard error: 0.1846 on 16 degrees of freedom
Multiple R-squared:  0.3451,    Adjusted R-squared:  0.2223
F-statistic: 2.81 on 3 and 16 DF,  p-value: 0.07283
> # Standardised beta coefficients
> standardCoefs(ad_model2_HC)
              b          beta
wcv      0.5370029 0.5076268
msfrac  0.3282386 0.1010385
nffrac  0.5229593 0.2709109

> #
> #
> summary(rd_model2_HC)
Call:
lm(formula = rd ~ wcv + msfrac + nffrac, data = data_controls)

Residuals:
    Min       1Q   Median       3Q      Max
-0.17510 -0.09608 -0.02431  0.04544  0.28809

Coefficients:
              Estimate Std. Error t value Pr(>|t|)
(Intercept) -0.1369     0.1400  -0.978  0.34260
wcv          0.5646     0.1567   3.604  0.00238 **
msfrac      0.3902     0.4811   0.811  0.42921
nffrac      0.3677     0.2814   1.307  0.20978
---
Signif. codes:  0 '***' 0.001 '**' 0.01 '*' 0.05 '.' 0.1 ' ' 1

```

```

Residual standard error: 0.1322 on 16 degrees of freedom
Multiple R-squared: 0.5094, Adjusted R-squared: 0.4174
F-statistic: 5.538 on 3 and 16 DF, p-value: 0.008404
> # Standardised beta coefficients
> standardCoefs(rd_model2_HC)
          b      beta
wcv      0.5646127 0.6451306
msfrac   0.3901822 0.1451756
nffrac   0.3676838 0.2302302

```

```

> #
> #
> summary(md_model2_HC)
Call:
lm(formula = md ~ wcv + msfrac + nffrac, data = data_controls)

```

```

Residuals:
      Min       1Q   Median       3Q      Max
-0.18678 -0.07356 -0.02982  0.05331  0.26663

```

```

Coefficients:
            Estimate Std. Error t value Pr(>|t|)
(Intercept) -0.04934    0.14489  -0.341  0.73790
wcv          0.53509    0.16211   3.301  0.00451 **
msfrac       0.33263    0.49781   0.668  0.51354
nffrac       0.39681    0.29118   1.363  0.19183
---
Signif. codes:  0 '***' 0.001 '**' 0.01 '*' 0.05 '.' 0.1 ' ' 1

```

```

Residual standard error: 0.1368 on 16 degrees of freedom
Multiple R-squared: 0.4681, Adjusted R-squared: 0.3684
F-statistic: 4.694 on 3 and 16 DF, p-value: 0.01551

```

```

> # Standardised beta coefficients
> standardCoefs(md_model2_HC)
          b      beta
wcv      0.5350902 0.6152013
msfrac   0.3326255 0.1245303
nffrac   0.3968086 0.2500127

```

```

> ##### MODEL 2: MS

```

```

> #
> #
> summary(ivf_model2_MS)
Call:
lm(formula = ivf ~ wcv + msfrac + nffrac, data = data_multiple_sclerosis)

```

```

Residuals:
      Min       1Q   Median       3Q      Max
-0.08678 -0.04689 -0.02072  0.01904  0.23148

```

```

Coefficients:
            Estimate Std. Error t value Pr(>|t|)
(Intercept) 0.093097    0.052706   1.766  0.0901 .

```

```

wcv          -0.005985    0.085885   -0.070    0.9450
msfrac       -0.177201    0.148676   -1.192    0.2450
nffrac       -0.027333    0.130839   -0.209    0.8363
---
Signif. codes:  0 '***' 0.001 '**' 0.01 '*' 0.05 '.' 0.1 ' ' 1

```

```

Residual standard error: 0.07697 on 24 degrees of freedom
Multiple R-squared:  0.08165,    Adjusted R-squared:  -0.03314
F-statistic: 0.7113 on 3 and 24 DF,  p-value: 0.5548

```

```

> # Standardised beta coefficients
> standardCoefs(ivf_model2_MS)

```

```

              b          beta
wcv      -0.005984537 -0.01401164
msfrac  -0.177200658 -0.26179971
nffrac  -0.027333048 -0.04671920

```

```

> #
> #

```

```

> summary(ndi_model2_MS)

```

```

Call:

```

```

lm(formula = ndi ~ wcv + msfrac + nffrac, data = data_multiple_sclerosis)

```

```

Residuals:

```

```

      Min       1Q   Median       3Q      Max
-0.44467 -0.10585 -0.03327  0.08482  0.38173

```

```

Coefficients:

```

```

              Estimate Std. Error t value Pr(>|t|)
(Intercept)   0.3313      0.1376   2.408  0.0241 *
wcv           -0.4798      0.2242  -2.140  0.0427 *
msfrac        1.9109      0.3880   4.925 5.03e-05 ***
nffrac        0.5661      0.3415   1.658  0.1104
---

```

```

Signif. codes:  0 '***' 0.001 '**' 0.01 '*' 0.05 '.' 0.1 ' ' 1

```

```

Residual standard error: 0.2009 on 24 degrees of freedom
Multiple R-squared:  0.6711,    Adjusted R-squared:  0.63
F-statistic: 16.32 on 3 and 24 DF,  p-value: 5.39e-06

```

```

> # Standardised beta coefficients
> standardCoefs(ndi_model2_MS)

```

```

              b          beta
wcv      -0.4797959 -0.2575890
msfrac   1.9109297  0.6473826
nffrac   0.5660951  0.2218754

```

```

> #
> #

```

```

> summary(odi_model2_MS)

```

```

Call:

```

```

lm(formula = odi ~ wcv + msfrac + nffrac, data = data_multiple_sclerosis)

```

```

Residuals:

```

```

      Min       1Q   Median       3Q      Max
-0.139583 -0.044075  0.007777  0.043264  0.117817

```

Coefficients:

|             | Estimate | Std. Error | t value | Pr(> t )     |
|-------------|----------|------------|---------|--------------|
| (Intercept) | 0.05371  | 0.04602    | 1.167   | 0.25466      |
| wcv         | 0.39474  | 0.07499    | 5.264   | 2.13e-05 *** |
| msfrac      | 0.18346  | 0.12982    | 1.413   | 0.17044      |
| nffrac      | 0.32400  | 0.11425    | 2.836   | 0.00913 **   |

---

Signif. codes: 0 '\*\*\*' 0.001 '\*\*' 0.01 '\*' 0.05 '.' 0.1 ' ' 1

Residual standard error: 0.06721 on 24 degrees of freedom

Multiple R-squared: 0.6292, Adjusted R-squared: 0.5828

F-statistic: 13.57 on 3 and 24 DF, p-value: 2.211e-05

> # Standardised beta coefficients

> standardCoefs(odi\_model2\_MS)

|        | b         | beta      |
|--------|-----------|-----------|
| wcv    | 0.3947435 | 0.6726074 |
| msfrac | 0.1834605 | 0.1972580 |
| nffrac | 0.3239980 | 0.4030305 |

> #

> #

> summary(fa\_model2\_MS)

Call:

lm(formula = fa ~ wcv + msfrac + nffrac, data = data\_multiple\_sclerosis)

Residuals:

| Min      | 1Q       | Median  | 3Q      | Max     |
|----------|----------|---------|---------|---------|
| -0.27815 | -0.17140 | 0.01079 | 0.14338 | 0.31141 |

Coefficients:

|             | Estimate | Std. Error | t value | Pr(> t ) |
|-------------|----------|------------|---------|----------|
| (Intercept) | 0.18414  | 0.13067    | 1.409   | 0.172    |
| wcv         | -0.03376 | 0.21293    | -0.159  | 0.875    |
| msfrac      | 0.62934  | 0.36860    | 1.707   | 0.101    |
| nffrac      | 0.26730  | 0.32437    | 0.824   | 0.418    |

Residual standard error: 0.1908 on 24 degrees of freedom

Multiple R-squared: 0.2056, Adjusted R-squared: 0.1063

F-statistic: 2.071 on 3 and 24 DF, p-value: 0.1308

> # Standardised beta coefficients

> standardCoefs(fa\_model2\_MS)

|        | b          | beta        |
|--------|------------|-------------|
| wcv    | -0.0337635 | -0.02965565 |
| msfrac | 0.6293449  | 0.34881415  |
| nffrac | 0.2673001  | 0.17139892  |

> #

> #

> summary(ad\_model2\_MS)

Call:

lm(formula = ad ~ wcv + msfrac + nffrac, data = data\_multiple\_sclerosis)

Residuals:

| Min     | 1Q      | Median  | 3Q     | Max    |
|---------|---------|---------|--------|--------|
| -0.4627 | -0.1494 | -0.0224 | 0.1140 | 0.5926 |

```

Coefficients:
              Estimate Std. Error t value Pr(>|t|)
(Intercept)  1.42782    0.19041   7.499 9.73e-08 ***
wcv          -0.01101    0.31028  -0.035 0.971982
msfrac      -2.38402    0.53713  -4.438 0.000173 ***
nffrac      -1.37354    0.47268  -2.906 0.007753 **
---
Signif. codes:  0 '***' 0.001 '**' 0.01 '*' 0.05 '.' 0.1 ' ' 1

Residual standard error: 0.2781 on 24 degrees of freedom
Multiple R-squared:  0.6773,    Adjusted R-squared:  0.637
F-statistic: 16.79 on 3 and 24 DF,  p-value: 4.305e-06
> # Standardised beta coefficients
> standardCoefs(ad_model2_MS)
              b          beta
wcv      -0.01101194 -0.004230403
msfrac  -2.38401525 -0.577926212
nffrac  -1.37354360 -0.385220462

> #
> #
> summary(rd_model2_MS)
Call:
lm(formula = rd ~ wcv + msfrac + nffrac, data = data_multiple_sclerosis)

Residuals:
      Min       1Q   Median       3Q      Max
-0.46981 -0.26319  0.02215  0.15040  0.81246

Coefficients:
              Estimate Std. Error t value Pr(>|t|)
(Intercept)  1.06853    0.22824   4.682 9.33e-05 ***
wcv          -0.02189    0.37191  -0.059 0.9536
msfrac      -1.75433    0.64382  -2.725 0.0118 *
nffrac      -1.29284    0.56658  -2.282 0.0317 *
---
Signif. codes:  0 '***' 0.001 '**' 0.01 '*' 0.05 '.' 0.1 ' ' 1

Residual standard error: 0.3333 on 24 degrees of freedom
Multiple R-squared:  0.4907,    Adjusted R-squared:  0.4271
F-statistic: 7.709 on 3 and 24 DF,  p-value: 0.0008919
> # Standardised beta coefficients
> standardCoefs(rd_model2_MS)
              b          beta
wcv      -0.02188643 -0.008811925
msfrac  -1.75433283 -0.445710960
nffrac  -1.29284483 -0.380006708

```



```

> #
> #
> summary(md_model2_MS)
Call:
lm(formula = md ~ wcv + msfrac + nffrac, data = data_multiple_sclerosis)

Residuals:
    Min       1Q   Median       3Q      Max
-0.46421 -0.18669 -0.03164  0.14455  0.73870

Coefficients:
            Estimate Std. Error t value Pr(>|t|)
(Intercept)  1.18565     0.20928   5.665 7.8e-06 ***
wcv          -0.01151     0.34103  -0.034 0.97336
msfrac      -1.94266     0.59036  -3.291 0.00308 **
nffrac      -1.35024     0.51953  -2.599 0.01574 *
---
Signif. codes:  0 '***' 0.001 '**' 0.01 '*' 0.05 '.' 0.1 ' ' 1

Residual standard error: 0.3056 on 24 degrees of freedom
Multiple R-squared:  0.5721,    Adjusted R-squared:  0.5186
F-statistic: 10.7 on 3 and 24 DF,  p-value: 0.0001181
> # Standardised beta coefficients
> standardCoefs(md_model2_MS)
              b          beta
wcv      -0.01150839 -0.004632017
msfrac  -1.94266204 -0.493399049
nffrac  -1.35023562 -0.396747456

```

```

> ##### MODEL 3: CONTROLS

> #
> #
> summary(ivf_model3_HC)
Call:
lm(formula = ivf ~ wcv + nfrac, data = data_controls)

Residuals:
    Min       1Q   Median       3Q      Max
-0.068467 -0.031470 -0.014156  0.001965  0.119724

Coefficients:
              Estimate Std. Error t value Pr(>|t|)
(Intercept) -0.06236     0.04354  -1.432   0.170
wcv           0.09689     0.06679   1.451   0.165
nfrac        0.19911     0.12189   1.634   0.121

Residual standard error: 0.05748 on 17 degrees of freedom
Multiple R-squared:  0.2078,    Adjusted R-squared:  0.1146
F-statistic:  2.23 on 2 and 17 DF,  p-value: 0.1381
> # Standardised beta coefficients
> standardCoefs(ivf_model3_HC)
              b          beta
wcv    0.09689124 0.3139253
nfrac  0.19910792 0.3535258

> #
> #
> summary(ndi_model3_HC)
Call:
lm(formula = ndi ~ wcv + nfrac, data = data_controls)

Residuals:
    Min       1Q   Median       3Q      Max
-0.21168 -0.09274  0.01848  0.09188  0.21352

Coefficients:
              Estimate Std. Error t value Pr(>|t|)
(Intercept)   1.0677     0.1094   9.758 2.22e-08 ***
wcv           -0.8058     0.1679  -4.801 0.000167 ***
nfrac        -0.1167     0.3063  -0.381 0.707835
---
Signif. codes:  0 '***' 0.001 '**' 0.01 '*' 0.05 '.' 0.1 ' ' 1

Residual standard error: 0.1445 on 17 degrees of freedom
Multiple R-squared:  0.5755,    Adjusted R-squared:  0.5256
F-statistic: 11.52 on 2 and 17 DF,  p-value: 0.0006871
> # Standardised beta coefficients
> standardCoefs(ndi_model3_HC)
              b          beta
wcv   -0.8058089 -0.76049565
nfrac -0.1167391 -0.06037705

```

```

> #
> #
> summary(odi_model3_HC)
Call:
lm(formula = odi ~ wcv + nfrac, data = data_controls)

Residuals:
    Min       1Q   Median       3Q      Max
-0.070917 -0.031150  0.006607  0.028346  0.123355

Coefficients:
            Estimate Std. Error t value Pr(>|t|)
(Intercept)  0.30462    0.03768   8.084 3.16e-07 ***
wcv          0.40821    0.05780   7.062 1.91e-06 ***
nfrac       -0.20131    0.10548  -1.909  0.0734 .
---
Signif. codes:  0 '***' 0.001 '**' 0.01 '*' 0.05 '.' 0.1 ' ' 1

Residual standard error: 0.04974 on 17 degrees of freedom
Multiple R-squared:  0.7662,    Adjusted R-squared:  0.7387
F-statistic: 27.85 on 2 and 17 DF,  p-value: 4.321e-06
> # Standardised beta coefficients
> standardCoefs(odi_model3_HC)
           b          beta
wcv      0.4082054  0.8303175
nfrac -0.2013050 -0.2243938

> #
> #
> summary(fa_model3_HC)
Call:
lm(formula = fa ~ wcv + nfrac, data = data_controls)

Residuals:
    Min       1Q   Median       3Q      Max
-0.23724 -0.05576 -0.01007  0.05907  0.12670

Coefficients:
            Estimate Std. Error t value Pr(>|t|)
(Intercept)  0.57018    0.07152   7.972 3.83e-07 ***
wcv         -0.49008    0.10972  -4.467 0.000339 ***
nfrac       0.06418    0.20021   0.321 0.752448
---
Signif. codes:  0 '***' 0.001 '**' 0.01 '*' 0.05 '.' 0.1 ' ' 1

Residual standard error: 0.09442 on 17 degrees of freedom
Multiple R-squared:  0.545,    Adjusted R-squared:  0.4914
F-statistic: 10.18 on 2 and 17 DF,  p-value: 0.00124
> # Standardised beta coefficients
> standardCoefs(fa_model3_HC)
           b          beta
wcv     -0.49007759 -0.73262958
nfrac  0.06417904  0.05257795

```

```

> #
> #
> summary(ad_model3_HC)
Call:
lm(formula = ad ~ wcv + nffrac, data = data_controls)

Residuals:
    Min       1Q   Median       3Q      Max
-0.24276 -0.11443 -0.03911  0.06542  0.32769

Coefficients:
            Estimate Std. Error t value Pr(>|t|)
(Intercept)  0.1347     0.1367   0.986  0.3381
wcv          0.5579     0.2097   2.660  0.0165 *
nffrac       0.5394     0.3827   1.410  0.1767
---
Signif. codes:  0 '***' 0.001 '**' 0.01 '*' 0.05 '.' 0.1 ' ' 1

Residual standard error: 0.1805 on 17 degrees of freedom
Multiple R-squared:  0.3353,    Adjusted R-squared:  0.2571
F-statistic: 4.288 on 2 and 17 DF,  p-value: 0.03106
> # Standardised beta coefficients
> standardCoefs(ad_model3_HC)
           b      beta
wcv    0.5578856 0.5273671
nffrac 0.5393761 0.2794154

> #
> #
> summary(rd_model3_HC)
Call:
lm(formula = rd ~ wcv + nffrac, data = data_controls)

Residuals:
    Min       1Q   Median       3Q      Max
-0.16102 -0.08164 -0.03465  0.03313  0.30887

Coefficients:
            Estimate Std. Error t value Pr(>|t|)
(Intercept) -0.05758     0.09914  -0.581  0.56898
wcv          0.58944     0.15208   3.876  0.00121 **
nffrac       0.38720     0.27752   1.395  0.18091
---
Signif. codes:  0 '***' 0.001 '**' 0.01 '*' 0.05 '.' 0.1 ' ' 1

Residual standard error: 0.1309 on 17 degrees of freedom
Multiple R-squared:  0.4892,    Adjusted R-squared:  0.4292
F-statistic: 8.142 on 2 and 17 DF,  p-value: 0.00331
> # Standardised beta coefficients
> standardCoefs(rd_model3_HC)
           b      beta
wcv    0.5894362 0.6734942
nffrac 0.3871988 0.2424498

```

```

> #
> #
> summary(md_model3_HC)
Call:
lm(formula = md ~ wcv + nffrac, data = data_controls)

Residuals:
    Min       1Q   Median       3Q      Max
-0.17478 -0.06897 -0.04345  0.03244  0.28433

Coefficients:
            Estimate Std. Error t value Pr(>|t|)
(Intercept)  0.01832    0.10194   0.180  0.85951
wcv          0.55625    0.15638   3.557  0.00242 **
nffrac       0.41344    0.28535   1.449  0.16556
---
Signif. codes:  0 '***' 0.001 '**' 0.01 '*' 0.05 '.' 0.1 ' ' 1

Residual standard error: 0.1346 on 17 degrees of freedom
Multiple R-squared:  0.4533,    Adjusted R-squared:  0.3889
F-statistic: 7.047 on 2 and 17 DF,  p-value: 0.005904
> # Standardised beta coefficients
> standardCoefs(md_model3_HC)
           b      beta
wcv      0.5562520 0.6395313
nffrac  0.4134449 0.2604946

> ##### MODEL 3: MS

> #
> #
> summary(ivf_model3_MS)
Call:
lm(formula = ivf ~ wcv + nffrac, data = data_multiple_sclerosis)

Residuals:
    Min       1Q   Median       3Q      Max
-0.078300 -0.053158 -0.007364  0.020618  0.222168

Coefficients:
            Estimate Std. Error t value Pr(>|t|)
(Intercept)  0.09183    0.05314   1.728  0.0963 .
wcv          -0.01968    0.08583  -0.229  0.8205
nffrac       -0.09811    0.11756  -0.835  0.4119
---
Signif. codes:  0 '***' 0.001 '**' 0.01 '*' 0.05 '.' 0.1 ' ' 1

Residual standard error: 0.07761 on 25 degrees of freedom
Multiple R-squared:  0.0273,    Adjusted R-squared:  -0.05052
F-statistic: 0.3508 on 2 and 25 DF,  p-value: 0.7075
> # Standardised beta coefficients
> standardCoefs(ivf_model3_MS)
           b      beta
wcv      -0.01968286 -0.04608362
nffrac  -0.09811126 -0.16769736

```

```

> #
> #
> summary(ndi_model3_MS)
Call:
lm(formula = ndi ~ wcv + nfrac, data = data_multiple_sclerosis)

Residuals:
    Min       1Q   Median       3Q      Max
-0.44633 -0.18572 -0.06742  0.26693  0.53608

Coefficients:
            Estimate Std. Error t value Pr(>|t|)
(Intercept)  0.3449     0.1911   1.805  0.08308 .
wcv          -0.3321     0.3086  -1.076  0.29219
nfrac         1.3294     0.4227   3.145  0.00425 **
---
Signif. codes:  0 '***' 0.001 '**' 0.01 '*' 0.05 '.' 0.1 ' ' 1

Residual standard error: 0.2791 on 25 degrees of freedom
Multiple R-squared:  0.3387,    Adjusted R-squared:  0.2858
F-statistic: 6.402 on 2 and 25 DF,  p-value: 0.005687
> # Standardised beta coefficients
> standardCoefs(ndi_model3_MS)
           b      beta
wcv    -0.3320733 -0.1782809
nfrac   1.3293665  0.5210322

> #
> #
> summary(odi_model3_MS)
Call:
lm(formula = odi ~ wcv + nfrac, data = data_multiple_sclerosis)

Residuals:
    Min       1Q   Median       3Q      Max
-0.150518 -0.046022  0.001462  0.044308  0.104112

Coefficients:
            Estimate Std. Error t value Pr(>|t|)
(Intercept)  0.05502     0.04692   1.173  0.252011
wcv          0.40893     0.07579   5.396 1.34e-05 ***
nfrac        0.39728     0.10381   3.827 0.000772 ***
---
Signif. codes:  0 '***' 0.001 '**' 0.01 '*' 0.05 '.' 0.1 ' ' 1

Residual standard error: 0.06854 on 25 degrees of freedom
Multiple R-squared:  0.5983,    Adjusted R-squared:  0.5662
F-statistic: 18.62 on 2 and 25 DF,  p-value: 1.119e-05
> # Standardised beta coefficients
> standardCoefs(odi_model3_MS)
           b      beta
wcv    0.4089258 0.6967726
nfrac  0.3972765 0.4941838

```

```

> #
> #
> summary(fa_model3_MS)
Call:
lm(formula = fa ~ wcv + nffrac, data = data_multiple_sclerosis)

Residuals:
    Min       1Q   Median       3Q      Max
-0.31439 -0.19284  0.03288  0.10356  0.32339

Coefficients:
            Estimate Std. Error t value Pr(>|t|)
(Intercept)  0.18863    0.13555   1.392  0.1763
wcv           0.01489    0.21894   0.068  0.9463
nffrac        0.51868    0.29991   1.729  0.0961 .
---
Signif. codes:  0 '***' 0.001 '**' 0.01 '*' 0.05 '.' 0.1 ' ' 1

Residual standard error: 0.198 on 25 degrees of freedom
Multiple R-squared:  0.1091,    Adjusted R-squared:  0.03786
F-statistic: 1.531 on 2 and 25 DF,  p-value: 0.2359
> # Standardised beta coefficients
> standardCoefs(fa_model3_MS)
           b           beta
wcv    0.01488739 0.01307611
nffrac 0.51867560 0.33258661

> #
> #
> summary(ad_model3_MS)
Call:
lm(formula = ad ~ wcv + nffrac, data = data_multiple_sclerosis)

Residuals:
    Min       1Q   Median       3Q      Max
-0.74795 -0.26388  0.07052  0.23271  0.73474

Coefficients:
            Estimate Std. Error t value Pr(>|t|)
(Intercept)  1.4108    0.2517   5.605 7.86e-06 ***
wcv          -0.1953    0.4065  -0.480 0.635110
nffrac       -2.3258    0.5569  -4.177 0.000314 ***
---
Signif. codes:  0 '***' 0.001 '**' 0.01 '*' 0.05 '.' 0.1 ' ' 1

Residual standard error: 0.3676 on 25 degrees of freedom
Multiple R-squared:  0.4124,    Adjusted R-squared:  0.3654
F-statistic: 8.774 on 2 and 25 DF,  p-value: 0.001298
> # Standardised beta coefficients
> standardCoefs(ad_model3_MS)
           b           beta
wcv    -0.1953059 -0.07502971
nffrac -2.3257767 -0.65228129

```

```

> #
> #
> summary(rd_model3_MS)
Call:
lm(formula = rd ~ wcv + nffrac, data = data_multiple_sclerosis)

Residuals:
    Min       1Q   Median       3Q      Max
-0.67285 -0.26975  0.00797  0.23831  0.91703

Coefficients:
            Estimate Std. Error t value Pr(>|t|)
(Intercept)  1.0560     0.2558   4.128 0.000357 ***
wcv          -0.1575     0.4132  -0.381 0.706307
nffrac       -1.9936     0.5660  -3.522 0.001671 **
---
Signif. codes:  0 '***' 0.001 '**' 0.01 '*' 0.05 '.' 0.1 ' ' 1

Residual standard error: 0.3737 on 25 degrees of freedom
Multiple R-squared:  0.3332,    Adjusted R-squared:  0.2799
F-statistic: 6.246 on 2 and 25 DF,  p-value: 0.006309
> # Standardised beta coefficients
> standardCoefs(rd_model3_MS)
           b          beta
wcv      -0.1575034 -0.0634141
nffrac  -1.9935676 -0.5859706

> #
> #
> summary(md_model3_MS)
Call:
lm(formula = md ~ wcv + nffrac, data = data_multiple_sclerosis)

Residuals:
    Min       1Q   Median       3Q      Max
-0.69666 -0.22616  0.08983  0.18999  0.85450

Coefficients:
            Estimate Std. Error t value Pr(>|t|)
(Intercept)  1.1718     0.2470   4.745 7.22e-05 ***
wcv          -0.1617     0.3989  -0.405 0.688687
nffrac       -2.1262     0.5464  -3.891 0.000655 ***
---
Signif. codes:  0 '***' 0.001 '**' 0.01 '*' 0.05 '.' 0.1 ' ' 1

Residual standard error: 0.3607 on 25 degrees of freedom
Multiple R-squared:  0.379,    Adjusted R-squared:  0.3294
F-statistic: 7.63 on 2 and 25 DF,  p-value: 0.002591
> # Standardised beta coefficients
> standardCoefs(md_model3_MS)
           b          beta
wcv      -0.161684 -0.06507626
nffrac  -2.126182 -0.62474812

```



```

> ##### MODEL 4: CONTROLS

> #
> #
> summary(ivf_model4_HC)
Call:
lm(formula = ivf ~ msfrac + nfrac, data = data_controls)

Residuals:
    Min       1Q   Median       3Q      Max
-0.04887 -0.03827 -0.01734  0.00874  0.12060

Coefficients:
              Estimate Std. Error t value Pr(>|t|)
(Intercept) -0.11254     0.05536  -2.033   0.058 .
msfrac       0.39097     0.19567   1.998   0.062 .
nfrac       0.17024     0.11627   1.464   0.161
---
Signif. codes:  0 '***' 0.001 '**' 0.01 '*' 0.05 '.' 0.1 ' ' 1

Residual standard error: 0.05483 on 17 degrees of freedom
Multiple R-squared:  0.2791,    Adjusted R-squared:  0.1942
F-statistic:  3.29 on 2 and 17 DF,  p-value: 0.06197
> # Standardised beta coefficients
> standardCoefs(ivf_model4_HC)
              b          beta
msfrac 0.3909676 0.4124886
nfrac 0.1702448 0.3022780

> #
> #
> summary(ndi_model4_HC)

Call:
lm(formula = ndi ~ msfrac + nfrac, data = data_controls)

Residuals:
    Min       1Q   Median       3Q      Max
-0.3760 -0.1393  0.0372  0.1468  0.2626

Coefficients:
              Estimate Std. Error t value Pr(>|t|)
(Intercept)   0.7443     0.2238   3.325   0.004 **
msfrac       -0.0212     0.7911  -0.027   0.979
nfrac       -0.0117     0.4701  -0.025   0.980
---
Signif. codes:  0 '***' 0.001 '**' 0.01 '*' 0.05 '.' 0.1 ' ' 1

Residual standard error: 0.2217 on 17 degrees of freedom
Multiple R-squared:  8.459e-05, Adjusted R-squared:  -0.1176
F-statistic: 0.0007191 on 2 and 17 DF,  p-value: 0.9993
> # Standardised beta coefficients
> standardCoefs(ndi_model4_HC)
              b          beta
msfrac -0.02120068 -0.006515441
nfrac -0.01169630 -0.006049282

```

```

> #
> #
> summary(odi_model4_HC)
Call:
lm(formula = odi ~ msfrac + nffrac, data = data_controls)

Residuals:
    Min       1Q   Median       3Q      Max
-0.13073 -0.06594 -0.03671  0.07443  0.18771

Coefficients:
            Estimate Std. Error t value Pr(>|t|)
(Intercept)  0.42701     0.09873   4.325  0.00046 ***
msfrac       0.19142     0.34897   0.549  0.59046
nffrac      -0.26207     0.20736  -1.264  0.22335
---
Signif. codes:  0 '***' 0.001 '**' 0.01 '*' 0.05 '.' 0.1 ' ' 1

Residual standard error: 0.09779 on 17 degrees of freedom
Multiple R-squared:  0.0962,    Adjusted R-squared:  -0.01012
F-statistic: 0.9048 on 2 and 17 DF,  p-value: 0.4233
> # Standardised beta coefficients
> standardCoefs(odi_model4_HC)
           b           beta
msfrac  0.1914243  0.1267920
nffrac -0.2620686 -0.2921266

> #
> #
> summary(fa_model4_HC)
Call:
lm(formula = fa ~ msfrac + nffrac, data = data_controls)

Residuals:
    Min       1Q   Median       3Q      Max
-0.34531 -0.07387  0.02193  0.08139  0.18450

Coefficients:
            Estimate Std. Error t value Pr(>|t|)
(Intercept)  0.4957     0.1355   3.660  0.00194 **
msfrac      -0.5458     0.4788  -1.140  0.27005
nffrac       0.1503     0.2845   0.528  0.60402
---
Signif. codes:  0 '***' 0.001 '**' 0.01 '*' 0.05 '.' 0.1 ' ' 1

Residual standard error: 0.1342 on 17 degrees of freedom
Multiple R-squared:  0.08117,    Adjusted R-squared:  -0.02693
F-statistic: 0.7509 on 2 and 17 DF,  p-value: 0.487
> # Standardised beta coefficients
> standardCoefs(fa_model4_HC)
           b           beta
msfrac -0.5458467 -0.2657172
nffrac  0.1503371  0.1231619

```

```

> #
> #
> summary(ad_model4_HC)
Call:
lm(formula = ad ~ msfrac + nfrac, data = data_controls)

Residuals:
    Min       1Q   Median       3Q      Max
-0.29422 -0.14149 -0.04616  0.15417  0.36413

Coefficients:
            Estimate Std. Error t value Pr(>|t|)
(Intercept)  0.2129     0.2122   1.003   0.330
msfrac       0.6504     0.7500   0.867   0.398
nfrac       0.4401     0.4456   0.988   0.337

Residual standard error: 0.2102 on 17 degrees of freedom
Multiple R-squared:  0.09848,    Adjusted R-squared:  -0.007583
F-statistic: 0.9285 on 2 and 17 DF,  p-value: 0.4143
> # Standardised beta coefficients
> standardCoefs(ad_model4_HC)
           b           beta
msfrac 0.6504072 0.2002085
nfrac  0.4400837 0.2279785

```

```

> #
> #
> summary(rd_model4_HC)
Call:
lm(formula = rd ~ msfrac + nfrac, data = data_controls)

Residuals:
    Min       1Q   Median       3Q      Max
-0.17928 -0.11246 -0.03797  0.04113  0.43361

Coefficients:
            Estimate Std. Error t value Pr(>|t|)
(Intercept)  0.01539     0.17431   0.088   0.931
msfrac       0.72891     0.61610   1.183   0.253
nfrac       0.28055     0.36609   0.766   0.454

Residual standard error: 0.1727 on 17 degrees of freedom
Multiple R-squared:  0.1111,    Adjusted R-squared:  0.00654
F-statistic: 1.063 on 2 and 17 DF,  p-value: 0.3674
> # Standardised beta coefficients
> standardCoefs(rd_model4_HC)
           b           beta
msfrac 0.7289150 0.2712084
nfrac  0.2805472 0.1756684

```

```

> #
> #
> summary(md_model4_HC)
Call:
lm(formula = md ~ msfrac + nfrac, data = data_controls)

Residuals:
    Min       1Q   Median       3Q      Max
-0.21117 -0.10256 -0.03048  0.09123  0.40454

Coefficients:
            Estimate Std. Error t value Pr(>|t|)
(Intercept)  0.09503    0.17374   0.547   0.592
msfrac       0.65365    0.61408   1.064   0.302
nfrac        0.31423    0.36489   0.861   0.401

Residual standard error: 0.1721 on 17 degrees of freedom
Multiple R-squared:  0.1059,    Adjusted R-squared:  0.0007095
F-statistic: 1.007 on 2 and 17 DF,  p-value: 0.3862
> # Standardised beta coefficients
> standardCoefs(md_model4_HC)
           b           beta
msfrac 0.6536466 0.2447161
nfrac  0.3142282 0.1979822

> ##### MODEL 4: MS

> #
> #
> summary(ivf_model4_MS)
Call:
lm(formula = ivf ~ msfrac + nfrac, data = data_multiple_sclerosis)

Residuals:
    Min       1Q   Median       3Q      Max
-0.08772 -0.04735 -0.02014  0.01904  0.23059

Coefficients:
            Estimate Std. Error t value Pr(>|t|)
(Intercept)  0.09012    0.03027   2.977  0.00638 **
msfrac      -0.17859    0.14438  -1.237  0.22760
nfrac       -0.02524    0.12479  -0.202  0.84134
---
Signif. codes:  0 '***' 0.001 '**' 0.01 '*' 0.05 '.' 0.1 ' ' 1

Residual standard error: 0.07542 on 25 degrees of freedom
Multiple R-squared:  0.08147,    Adjusted R-squared:  0.007984
F-statistic: 1.109 on 2 and 25 DF,  p-value: 0.3457
> # Standardised beta coefficients
> standardCoefs(ivf_model4_MS)
           b           beta
msfrac -0.17858703 -0.26384795
nfrac  -0.02524303 -0.04314682

```

```
> #
> #
> summary(ndi_model4_MS)
Call:
lm(formula = ndi ~ msfrac + nffrac, data = data_multiple_sclerosis)
```

```
Residuals:
    Min       1Q   Median       3Q      Max
-0.35629 -0.12913 -0.02661  0.13628  0.40552
```

```
Coefficients:
              Estimate Std. Error t value Pr(>|t|)
(Intercept)  0.09275     0.08622   1.076 0.292288
msfrac       1.79978     0.41117   4.377 0.000187 ***
nffrac       0.73366     0.35540   2.064 0.049508 *
---
Signif. codes:  0 '***' 0.001 '**' 0.01 '*' 0.05 '.' 0.1 ' ' 1
```

```
Residual standard error: 0.2148 on 25 degrees of freedom
Multiple R-squared:  0.6083,    Adjusted R-squared:  0.577
F-statistic: 19.41 on 2 and 25 DF,  p-value: 8.166e-06
```

```
> # Standardised beta coefficients
> standardCoefs(ndi_model4_MS)
              b      beta
msfrac 1.7997810 0.6097277
nffrac 0.7336576 0.2875499
```

```
> #
> #
> summary(odi_model4_MS)
Call:
lm(formula = odi ~ msfrac + nffrac, data = data_multiple_sclerosis)
```

```
Residuals:
    Min       1Q   Median       3Q      Max
-0.211085 -0.045019  0.003825  0.047606  0.265698
```

```
Coefficients:
              Estimate Std. Error t value Pr(>|t|)
(Intercept)  0.2500     0.0388   6.443 9.54e-07 ***
msfrac       0.2749     0.1850   1.486  0.150
nffrac       0.1861     0.1599   1.164  0.255
---
Signif. codes:  0 '***' 0.001 '**' 0.01 '*' 0.05 '.' 0.1 ' ' 1
```

```
Residual standard error: 0.09666 on 25 degrees of freedom
Multiple R-squared:  0.201,    Adjusted R-squared:  0.1371
F-statistic: 3.145 on 2 and 25 DF,  p-value: 0.06048
```

```
> # Standardised beta coefficients
> standardCoefs(odi_model4_MS)
              b      beta
msfrac 0.2749061 0.2955810
nffrac 0.1861389 0.2315437
```

```
> #
> #
> summary(fa_model4_MS)
Call:
lm(formula = fa ~ msfrac + nfrac, data = data_multiple_sclerosis)
```

```
Residuals:
      Min       1Q   Median       3Q      Max
-0.271752 -0.166537  0.006372  0.142816  0.315352
```

```
Coefficients:
              Estimate Std. Error t value Pr(>|t|)
(Intercept)  0.16735     0.07509   2.229  0.0351 *
msfrac       0.62152     0.35809   1.736  0.0949 .
nfrac       0.27909     0.30952   0.902  0.3758
---
Signif. codes:  0 '***' 0.001 '**' 0.01 '*' 0.05 '.' 0.1 ' ' 1
```

```
Residual standard error: 0.1871 on 25 degrees of freedom
Multiple R-squared:  0.2048,    Adjusted R-squared:  0.1412
F-statistic: 3.219 on 2 and 25 DF,  p-value: 0.05702
```

```
> # Standardised beta coefficients
> standardCoefs(fa_model4_MS)
              b          beta
msfrac 0.6215233 0.3444790
nfrac  0.2790916 0.1789599
```

```
> #
> #
> summary(ad_model4_MS)
Call:
lm(formula = ad ~ msfrac + nfrac, data = data_multiple_sclerosis)
```

```
Residuals:
      Min       1Q   Median       3Q      Max
-0.46101 -0.15031 -0.02163  0.11149  0.59463
```

```
Coefficients:
              Estimate Std. Error t value Pr(>|t|)
(Intercept)  1.4223     0.1094  13.005 1.26e-12 ***
msfrac      -2.3866     0.5216  -4.576 0.000112 ***
nfrac      -1.3697     0.4508  -3.038 0.005506 **
---
Signif. codes:  0 '***' 0.001 '**' 0.01 '*' 0.05 '.' 0.1 ' ' 1
```

```
Residual standard error: 0.2725 on 25 degrees of freedom
Multiple R-squared:  0.6773,    Adjusted R-squared:  0.6515
F-statistic: 26.23 on 2 and 25 DF,  p-value: 7.248e-07
```

```
> # Standardised beta coefficients
> standardCoefs(ad_model4_MS)
              b          beta
msfrac -2.386566 -0.5785446
nfrac  -1.369698 -0.3841419
```

```

> #
> #
> summary(rd_model4_MS)
Call:
lm(formula = rd ~ msfrac + nfrac, data = data_multiple_sclerosis)

Residuals:
    Min       1Q   Median       3Q      Max
-0.47323 -0.26309  0.02437  0.15149  0.81643

Coefficients:
            Estimate Std. Error t value Pr(>|t|)
(Intercept)  1.0576     0.1311   8.068 2.01e-08 ***
msfrac      -1.7594     0.6252  -2.814  0.00939 **
nfrac       -1.2852     0.5404  -2.378  0.02535 *
---
Signif. codes:  0 '***' 0.001 '**' 0.01 '*' 0.05 '.' 0.1 ' ' 1

Residual standard error: 0.3266 on 25 degrees of freedom
Multiple R-squared:  0.4907,    Adjusted R-squared:  0.4499
F-statistic: 12.04 on 2 and 25 DF,  p-value: 0.0002175
> # Standardised beta coefficients
> standardCoefs(rd_model4_MS)
           b           beta
msfrac -1.759403 -0.4469991
nfrac  -1.285201 -0.3777600

> #
> #
> summary(md_model4_MS)
Call:
lm(formula = md ~ msfrac + nfrac, data = data_multiple_sclerosis)

Residuals:
    Min       1Q   Median       3Q      Max
-0.46245 -0.18814 -0.03156  0.14488  0.74078

Coefficients:
            Estimate Std. Error t value Pr(>|t|)
(Intercept)  1.1799     0.1202   9.816 4.66e-10 ***
msfrac      -1.9453     0.5732  -3.394  0.0023 **
nfrac       -1.3462     0.4955  -2.717  0.0118 *
---
Signif. codes:  0 '***' 0.001 '**' 0.01 '*' 0.05 '.' 0.1 ' ' 1

Residual standard error: 0.2995 on 25 degrees of freedom
Multiple R-squared:  0.5721,    Adjusted R-squared:  0.5378
F-statistic: 16.71 on 2 and 25 DF,  p-value: 2.467e-05
> # Standardised beta coefficients
> standardCoefs(md_model4_MS)
           b           beta
msfrac -1.945328 -0.4940762
nfrac  -1.346216 -0.3955665

```

```

> ##### MODEL 5: CONTROLS

> #
> #
> summary(ivf_model5_HC)
Call:
lm(formula = ivf ~ gfapfrac + ibafrac, data = data_controls)

Residuals:
    Min       1Q   Median       3Q      Max
-0.067171 -0.033833 -0.010738  0.009946  0.132263

Coefficients:
              Estimate Std. Error t value Pr(>|t|)
(Intercept)   0.2236     0.1589   1.407  0.1775
gfapfrac     -0.7025     0.4756  -1.477  0.1579
ibafrac       1.3234     0.7179   1.844  0.0828 .
---
Signif. codes:  0 '***' 0.001 '**' 0.01 '*' 0.05 '.' 0.1 ' ' 1

Residual standard error: 0.05691 on 17 degrees of freedom
Multiple R-squared:  0.2234,    Adjusted R-squared:  0.1321
F-statistic: 2.446 on 2 and 17 DF,  p-value: 0.1166
> # Standardised beta coefficients
> standardCoefs(ivf_model5_HC)
              b          beta
gfapfrac -0.7025421 -0.3191147
ibafrac  1.3233966  0.3982690

> #
> #
> summary(ndi_model5_HC)
Call:
lm(formula = ndi ~ gfapfrac + ibafrac, data = data_controls)

Residuals:
    Min       1Q   Median       3Q      Max
-0.32435 -0.18018  0.08072  0.18435  0.24815

Coefficients:
              Estimate Std. Error t value Pr(>|t|)
(Intercept)   0.5866     0.6051   0.969  0.346
gfapfrac     0.6468     1.8109   0.357  0.725
ibafrac     -2.3535     2.7333  -0.861  0.401

Residual standard error: 0.2167 on 17 degrees of freedom
Multiple R-squared:  0.04474,    Adjusted R-squared:  -0.06764
F-statistic: 0.3981 on 2 and 17 DF,  p-value: 0.6777
> # Standardised beta coefficients
> standardCoefs(ndi_model5_HC)
              b          beta
gfapfrac  0.6468128  0.0855807
ibafrac -2.3534714 -0.2063090

```



```

> #
> #
> summary(odi_model5_HC)
Call:
lm(formula = odi ~ gfapfrac + ibafrac, data = data_controls)

Residuals:
    Min       1Q   Median       3Q      Max
-0.11748 -0.06645 -0.04244  0.06180  0.18434

Coefficients:
            Estimate Std. Error t value Pr(>|t|)
(Intercept)  0.2161     0.2806   0.770   0.452
gfapfrac     0.6284     0.8397   0.748   0.464
ibafrac     -0.7762     1.2674  -0.612   0.548

Residual standard error: 0.1005 on 17 degrees of freedom
Multiple R-squared:  0.04596, Adjusted R-squared:  -0.06628
F-statistic: 0.4095 on 2 and 17 DF, p-value: 0.6704
> # Standardised beta coefficients
> standardCoefs(odi_model5_HC)
           b           beta
gfapfrac  0.6283600  0.1791870
ibafrac  -0.7761571 -0.1466424

```

```

> #
> #
> summary(fa_model5_HC)
Call:
lm(formula = fa ~ gfapfrac + ibafrac, data = data_controls)

Residuals:
    Min       1Q   Median       3Q      Max
-0.39948 -0.07792  0.05769  0.09133  0.13584

Coefficients:
            Estimate Std. Error t value Pr(>|t|)
(Intercept)  0.367684   0.384829   0.955   0.353
gfapfrac    -0.001882   1.151684  -0.002   0.999
ibafrac     1.259993   1.738286   0.725   0.478

Residual standard error: 0.1378 on 17 degrees of freedom
Multiple R-squared:  0.03059, Adjusted R-squared:  -0.08346
F-statistic: 0.2682 on 2 and 17 DF, p-value: 0.7679
> # Standardised beta coefficients
> standardCoefs(fa_model5_HC)
           b           beta
gfapfrac -0.001882067 -0.0003944457
ibafrac  1.259992681  0.1749573932

```

```

> #
> #
> summary(ad_model5_HC)
Call:
lm(formula = ad ~ gfapfrac + ibafrac, data = data_controls)

Residuals:
    Min       1Q   Median       3Q      Max
-0.20988 -0.11719 -0.03551  0.12305  0.35821

Coefficients:
            Estimate Std. Error t value Pr(>|t|)
(Intercept)  0.7491     0.4789   1.564  0.13618
gfapfrac    -1.4098     1.4332  -0.984  0.33905
ibafrac      7.1961     2.1631   3.327  0.00399 **
---
Signif. codes:  0 '***' 0.001 '**' 0.01 '*' 0.05 '.' 0.1 ' ' 1

Residual standard error: 0.1715 on 17 degrees of freedom
Multiple R-squared:  0.3997,    Adjusted R-squared:  0.3291
F-statistic: 5.661 on 2 and 17 DF,  p-value: 0.01306
> # Standardised beta coefficients
> standardCoefs(ad_model5_HC)
           b           beta
gfapfrac -1.409845 -0.1868409
ibafrac   7.196123  0.6318458

```

```

> #
> #
> summary(rd_model5_HC)
Call:
lm(formula = rd ~ gfapfrac + ibafrac, data = data_controls)

Residuals:
    Min       1Q   Median       3Q      Max
-0.16217 -0.11006 -0.03879  0.04100  0.41924

Coefficients:
            Estimate Std. Error t value Pr(>|t|)
(Intercept)  0.5176     0.4685   1.105  0.285
gfapfrac    -1.0711     1.4020  -0.764  0.455
ibafrac      3.6584     2.1160   1.729  0.102

Residual standard error: 0.1678 on 17 degrees of freedom
Multiple R-squared:  0.1608,    Adjusted R-squared:  0.06206
F-statistic: 1.629 on 2 and 17 DF,  p-value: 0.2254
> # Standardised beta coefficients
> standardCoefs(rd_model5_HC)
           b           beta
gfapfrac -1.071125 -0.1715812
ibafrac   3.658432  0.3882725

```

```

> #
> #
> summary(md_model5_HC)
Call:
lm(formula = md ~ gfapfrac + ibafrac, data = data_controls)

Residuals:
    Min       1Q   Median       3Q      Max
-0.16473 -0.11381 -0.03856  0.04782  0.36762

Coefficients:
            Estimate Std. Error t value Pr(>|t|)
(Intercept)  0.5731     0.4381   1.308   0.208
gfapfrac    -1.1156     1.3112  -0.851   0.407
ibafrac      4.6881     1.9791   2.369   0.030 *
---
Signif. codes:  0 '***' 0.001 '**' 0.01 '*' 0.05 '.' 0.1 ' ' 1

Residual standard error: 0.1569 on 17 degrees of freedom
Multiple R-squared:  0.2568,    Adjusted R-squared:  0.1693
F-statistic: 2.936 on 2 and 17 DF,  p-value: 0.08028
> # Standardised beta coefficients
> standardCoefs(md_model5_HC)
           b          beta
gfapfrac -1.115644 -0.1798243
ibafrac   4.688111  0.5006484

> ##### MODEL 5: MS

> #
> #
> summary(ivf_model5_MS)
Call:
lm(formula = ivf ~ gfapfrac + ibafrac, data = data_multiple_sclerosis)

Residuals:
    Min       1Q   Median       3Q      Max
-0.07925 -0.06235 -0.02322  0.02709  0.19149

Coefficients:
            Estimate Std. Error t value Pr(>|t|)
(Intercept)  0.12867     0.05783   2.225   0.0353 *
gfapfrac    -0.15683     0.14601  -1.074   0.2931
ibafrac     -0.30979     0.32625  -0.950   0.3514
---
Signif. codes:  0 '***' 0.001 '**' 0.01 '*' 0.05 '.' 0.1 ' ' 1

Residual standard error: 0.07619 on 25 degrees of freedom
Multiple R-squared:  0.06258,    Adjusted R-squared:  -0.01242
F-statistic: 0.8344 on 2 and 25 DF,  p-value: 0.4459
> # Standardised beta coefficients
> standardCoefs(ivf_model5_MS)
           b          beta
gfapfrac -0.1568254 -0.2139386
ibafrac  -0.3097911 -0.1891433

```

```

> #
> #
> summary(ndi_model5_MS)
Call:
lm(formula = ndi ~ gfapfrac + ibafrac, data = data_multiple_sclerosis)

Residuals:
    Min       1Q   Median       3Q      Max
-0.3533 -0.2251 -0.1042  0.1679  0.5839

Coefficients:
            Estimate Std. Error t value Pr(>|t|)
(Intercept)  0.2339     0.2264   1.033  0.31148
gfapfrac     0.3137     0.5716   0.549  0.58802
ibafrac      3.6311     1.2771   2.843  0.00877 **
---
Signif. codes:  0 '***' 0.001 '**' 0.01 '*' 0.05 '.' 0.1 ' ' 1

Residual standard error: 0.2983 on 25 degrees of freedom
Multiple R-squared:  0.2447,    Adjusted R-squared:  0.1843
F-statistic: 4.049 on 2 and 25 DF,  p-value: 0.02997
> # Standardised beta coefficients
> standardCoefs(ndi_model5_MS)
           b          beta
gfapfrac 0.313679 0.09812299
ibafrac  3.631139 0.50836712

```

```

> #
> #
> summary(odi_model5_MS)
Call:
lm(formula = odi ~ gfapfrac + ibafrac, data = data_multiple_sclerosis)

Residuals:
    Min       1Q   Median       3Q      Max
-0.274107 -0.032878  0.008874  0.042744  0.299762

Coefficients:
            Estimate Std. Error t value Pr(>|t|)
(Intercept)  0.38953     0.07863   4.954  4.2e-05 ***
gfapfrac    -0.21406     0.19851  -1.078   0.291
ibafrac      0.33593     0.44354   0.757   0.456
---
Signif. codes:  0 '***' 0.001 '**' 0.01 '*' 0.05 '.' 0.1 ' ' 1

Residual standard error: 0.1036 on 25 degrees of freedom
Multiple R-squared:  0.08232,    Adjusted R-squared:  0.008901
F-statistic: 1.121 on 2 and 25 DF,  p-value: 0.3417
> # Standardised beta coefficients
> standardCoefs(odi_model5_MS)
           b          beta
gfapfrac -0.2140628 -0.2125212
ibafrac  0.3359324  0.1492665

```

```
> #
> #
> summary(fa_model5_MS)
Call:
lm(formula = fa ~ gfapfrac + ibafrac, data = data_multiple_sclerosis)
```

```
Residuals:
      Min       1Q   Median       3Q      Max
-0.24885 -0.20861  0.01768  0.14164  0.31518
```

```
Coefficients:
              Estimate Std. Error t value Pr(>|t|)
(Intercept)   0.2934     0.1452   2.021  0.0541 .
gfapfrac     -0.1507     0.3665  -0.411  0.6845
ibafrac       1.6837     0.8190   2.056  0.0504 .
---
Signif. codes:  0 '***' 0.001 '**' 0.01 '*' 0.05 '.' 0.1 ' ' 1
```

```
Residual standard error: 0.1913 on 25 degrees of freedom
Multiple R-squared:  0.1686,    Adjusted R-squared:  0.1021
F-statistic: 2.535 on 2 and 25 DF,  p-value: 0.09943
```

```
> # Standardised beta coefficients
> standardCoefs(fa_model5_MS)
              b              beta
gfapfrac -0.1506966 -0.07712194
ibafrac  1.6837183  0.38564986
```

```
> #
> #
> summary(ad_model5_MS)
Call:
lm(formula = ad ~ gfapfrac + ibafrac, data = data_multiple_sclerosis)
```

```
Residuals:
      Min       1Q   Median       3Q      Max
-0.69936 -0.36150  0.09499  0.23024  0.89670
```

```
Coefficients:
              Estimate Std. Error t value Pr(>|t|)
(Intercept)   1.1488     0.2994   3.838 0.000751 ***
gfapfrac     -0.3062     0.7558  -0.405 0.688857
ibafrac      -5.8018     1.6887  -3.436 0.002074 **
---
Signif. codes:  0 '***' 0.001 '**' 0.01 '*' 0.05 '.' 0.1 ' ' 1
```

```
Residual standard error: 0.3944 on 25 degrees of freedom
Multiple R-squared:  0.3238,    Adjusted R-squared:  0.2698
F-statistic: 5.987 on 2 and 25 DF,  p-value: 0.007509
```

```
> # Standardised beta coefficients
> standardCoefs(ad_model5_MS)
              b              beta
gfapfrac -0.3061555 -0.06852901
ibafrac  -5.8017727 -0.58122246
```

```

> #
> #
> summary(rd_model5_MS)
Call:
lm(formula = rd ~ gfapfrac + ibafrac, data = data_multiple_sclerosis)

Residuals:
    Min       1Q   Median       3Q      Max
-0.5218 -0.3001  0.0401  0.1815  1.0455

Coefficients:
            Estimate Std. Error t value Pr(>|t|)
(Intercept)  0.8912     0.2981   2.990  0.00619 **
gfapfrac    -0.4151     0.7527  -0.551  0.58619
ibafrac     -5.0218     1.6817  -2.986  0.00624 **
---
Signif. codes:  0 '***' 0.001 '**' 0.01 '*' 0.05 '.' 0.1 ' ' 1

Residual standard error: 0.3928 on 25 degrees of freedom
Multiple R-squared:  0.2634,    Adjusted R-squared:  0.2045
F-statistic:  4.47 on 2 and 25 DF,  p-value: 0.02189
> # Standardised beta coefficients
> standardCoefs(rd_model5_MS)
              b          beta
gfapfrac -0.4150926 -0.09737676
ibafrac  -5.0217878 -0.52725171

```

```

> #
> #
> summary(md_model5_MS)
Call:
lm(formula = md ~ gfapfrac + ibafrac, data = data_multiple_sclerosis)

Residuals:
    Min       1Q   Median       3Q      Max
-0.57621 -0.32582  0.04304  0.19157  0.99413

Coefficients:
            Estimate Std. Error t value Pr(>|t|)
(Intercept)  0.9807     0.2916   3.363  0.00249 **
gfapfrac    -0.3955     0.7363  -0.537  0.59586
ibafrac     -5.3158     1.6450  -3.231  0.00344 **
---
Signif. codes:  0 '***' 0.001 '**' 0.01 '*' 0.05 '.' 0.1 ' ' 1

Residual standard error: 0.3842 on 25 degrees of freedom
Multiple R-squared:  0.2956,    Adjusted R-squared:  0.2393
F-statistic:  5.247 on 2 and 25 DF,  p-value: 0.01251
> # Standardised beta coefficients
> standardCoefs(md_model5_MS)
              b          beta
gfapfrac -0.3955338 -0.0927585
ibafrac  -5.3158165 -0.5579424

```
